# Supplementary material for: Toward a More Definitive Goldilocks Mastectomy: Simultaneous Addition of the Lateral Intercostal Perforator Flap
Source: PubMed Central journal article supplement (PMC6467631; doi:10.1097/gox.0000000000002132), 2019-03-13

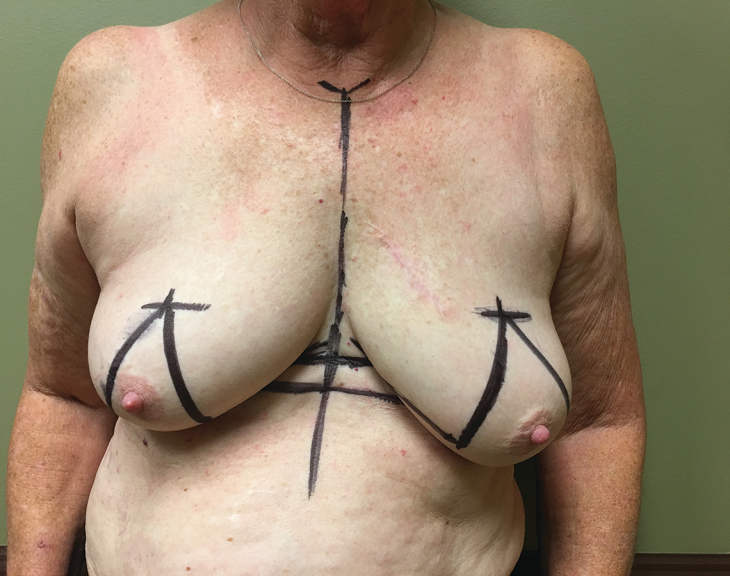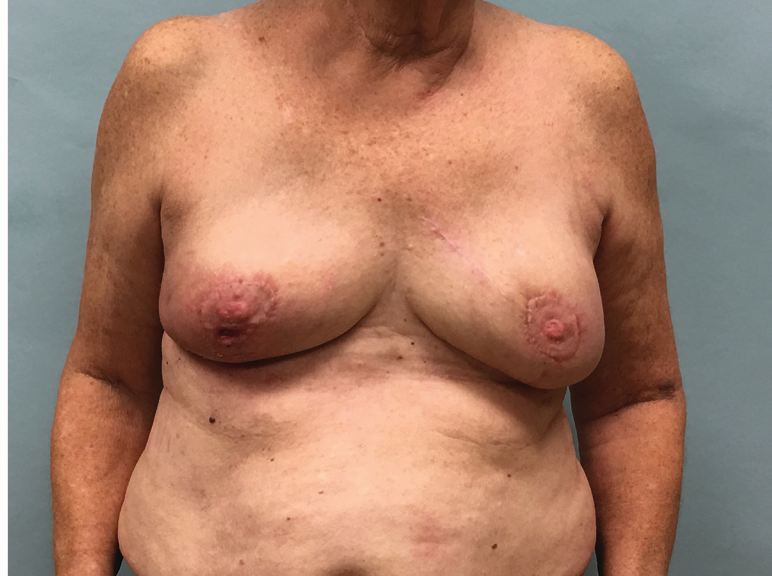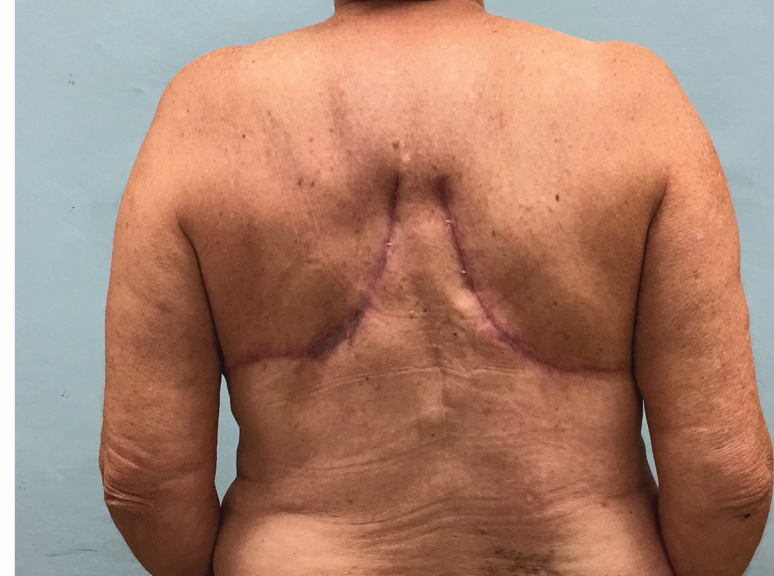

Supplement: gox-7-e2132-s002.pdf [file gox-7-e2132-s002.pdf]
